# Supplementary material for: Structural basis for energy transfer in a huge diatom PSI-FCPI supercomplex
Source: Nat Commun. 2020 Oct 8;11:5081. doi: 10.1038/s41467-020-18867-x (PMC7545214; doi:10.1038/s41467-020-18867-x)
Supplement: Supplementary file 1 — Supplementary Information [file 41467_2020_18867_MOESM1_ESM.pdf]

## **Supplementary Information**

### **Structural basis for energy transfer in a huge diatom PSI-FCPI supercomplex**

Caizhe Xu, Xiong Pi, Yawen Huang, Guangye Han, Xiaobo Chen, Xiaochun Qin, Guoqiang Huang, Songhao Zhao, Yanyan Yang, Tingyun Kuang, Wenda Wang, Sen-Fang Sui, Jian-Ren Shen

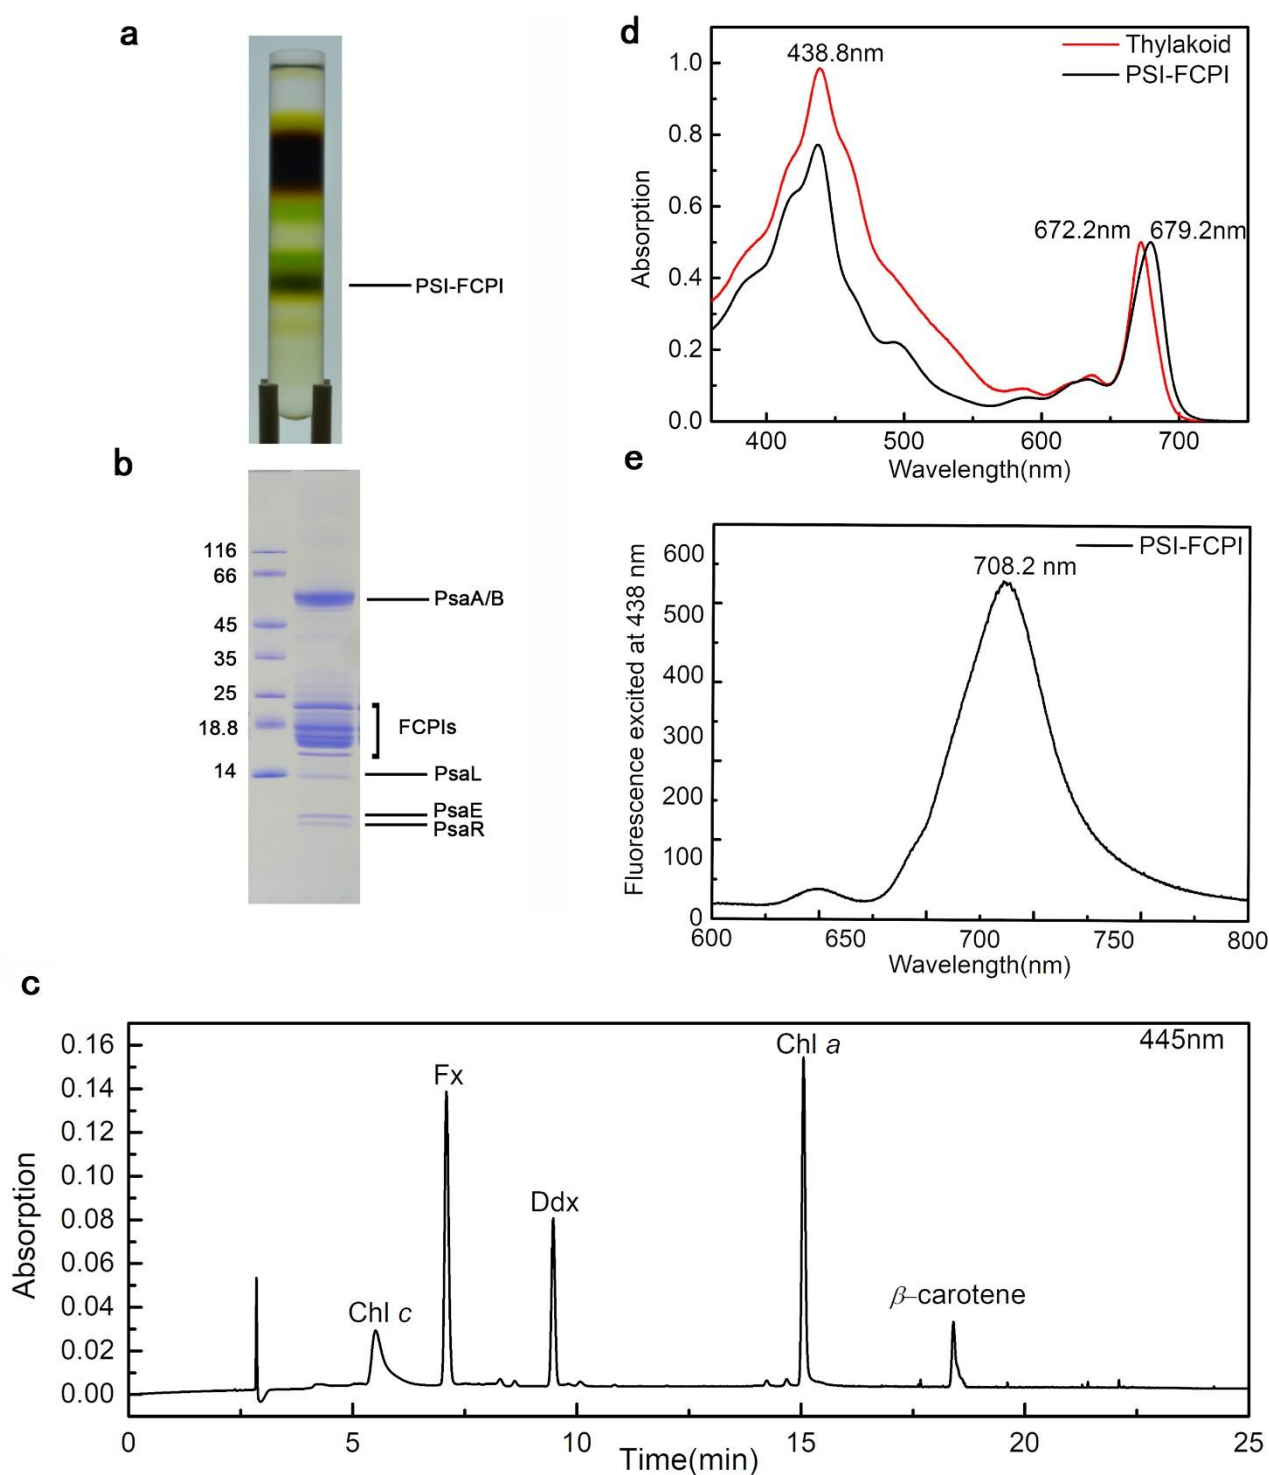

**Supplementary Fig. 1. Purification and characterization of *C. gracilis* PSI-FCPI.** **a**, Separation of the PSI-FCPI supercomplex by sucrose density gradient centrifugation. **b**, SDS-PAGE analysis of the PSI-FCPI supercomplex. **c**, Pigment analysis of PSI-FCPI by high performance liquid chromatography (HPLC), recorded at 445 nm. **d**, Absorption spectra of the thylakoid membrane and PSI-FCPI supercomplex. **e**, Fluorescence emission spectrum of PSI-FCPI at 77 K excited at 438 nm.

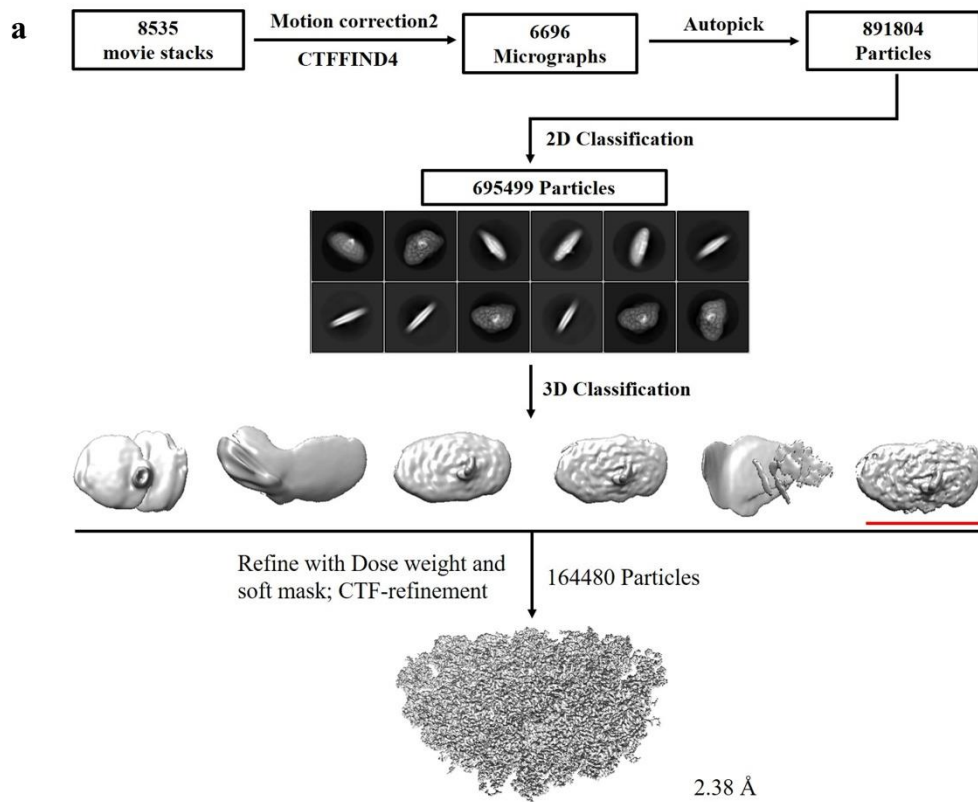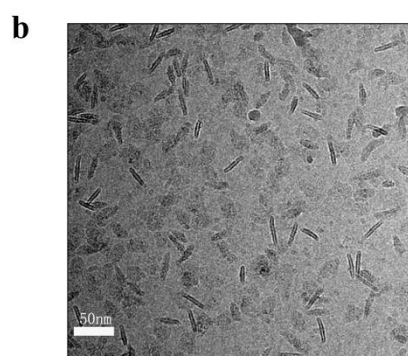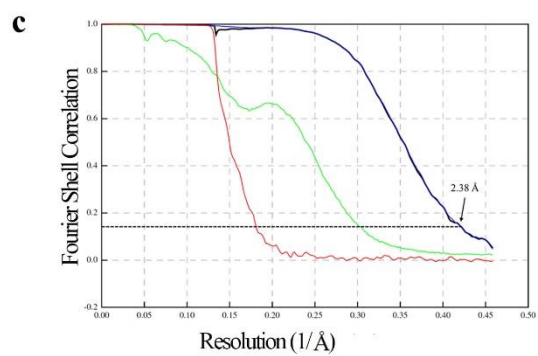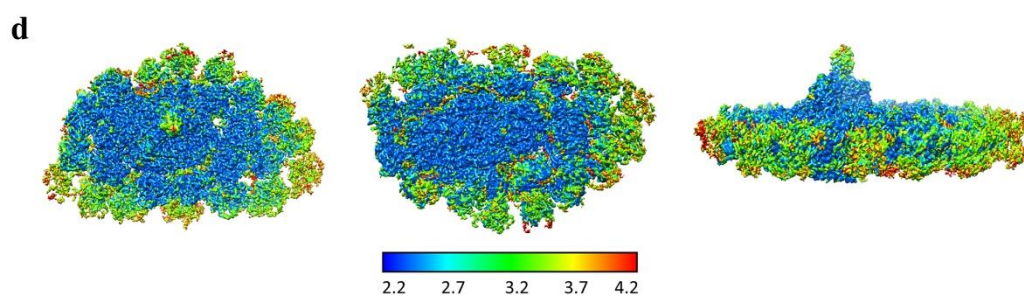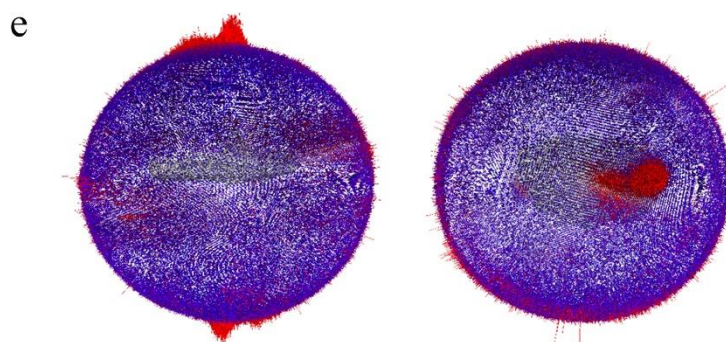

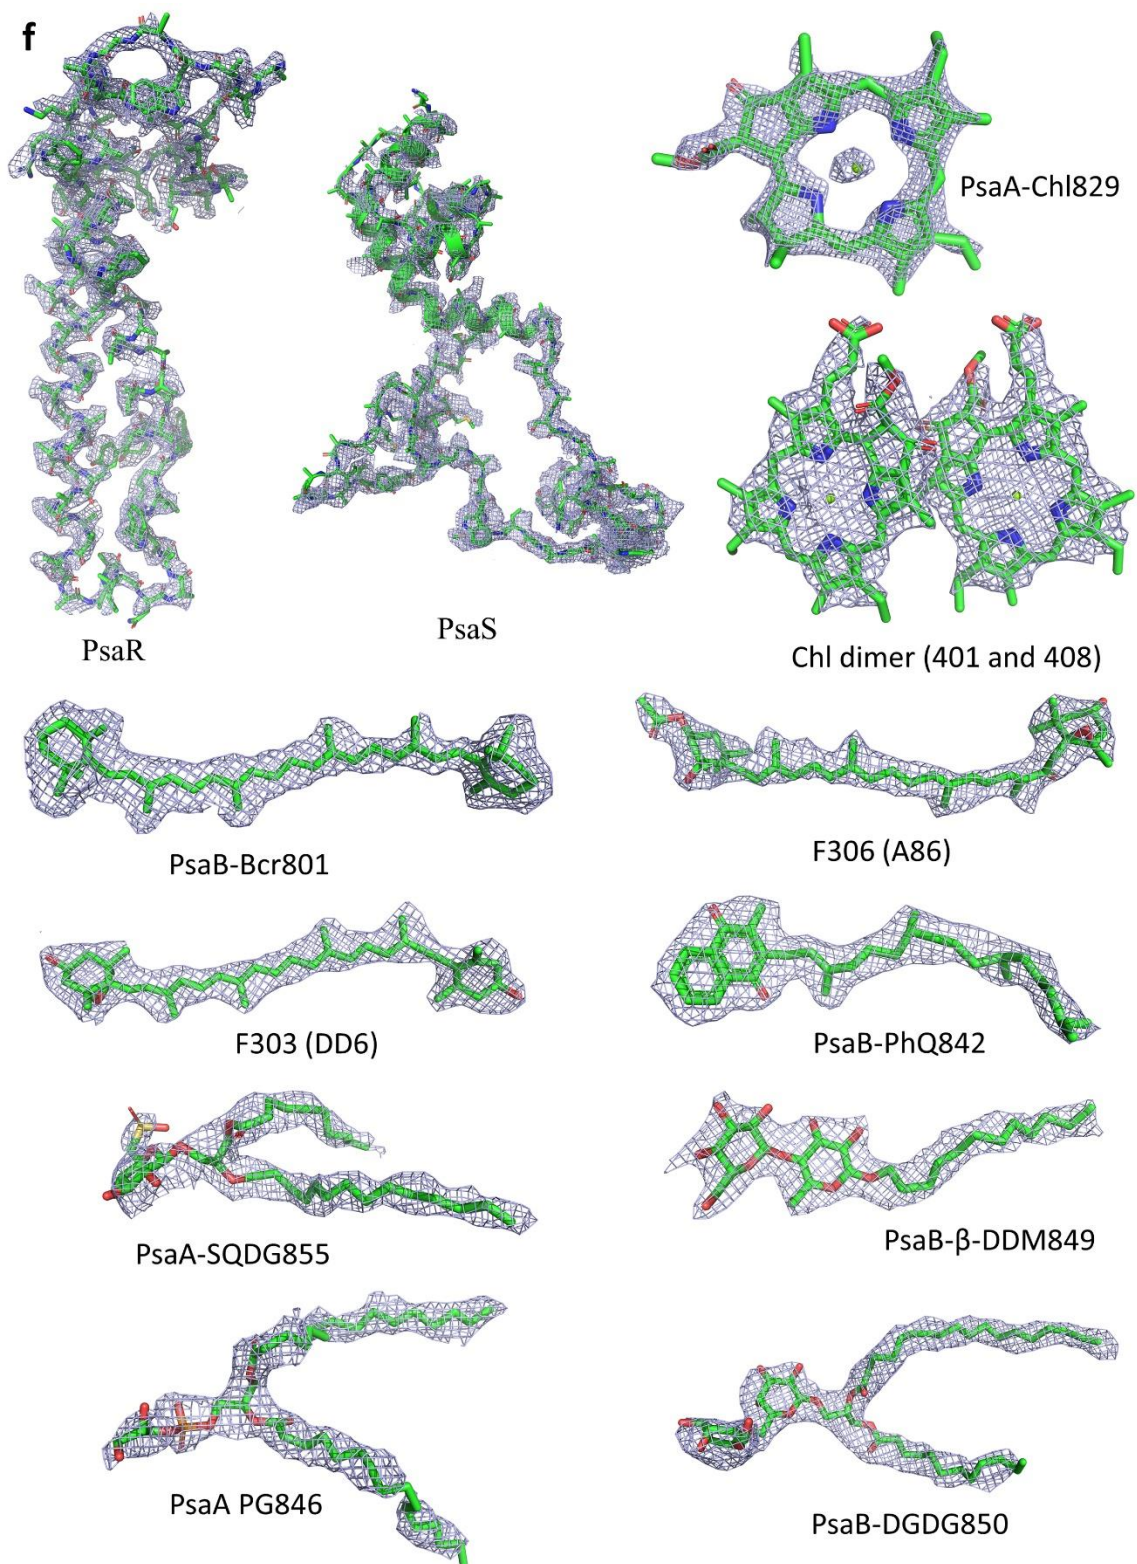

**Supplementary Fig. 2. Single particle cryo-EM analysis of the diatom PSI-FCPI supercomplex.** **a**, Flowchart for the cryo-EM data processing. **b**, A Cryo-EM image of the PSI-FCPI supercomplex. **c**, The gold standard Fourier shell correlation (FSC) curve for estimation of the resolution with the criterion of FSC 0.143. Black, corrected; blue, masked maps; green, unmasked maps; red, phase-randomized, masked maps. **d**, Full local resolution maps for the diatom PSI-FCPI supercomplex. Left, view from the luminal side; middle, view from the stromal side; right, side view. **e**, Euler distribution plot of the density map. **f**, Cryo-EM maps for the two novel subunits PsaR, PsaS and some representative cofactors.

**a**

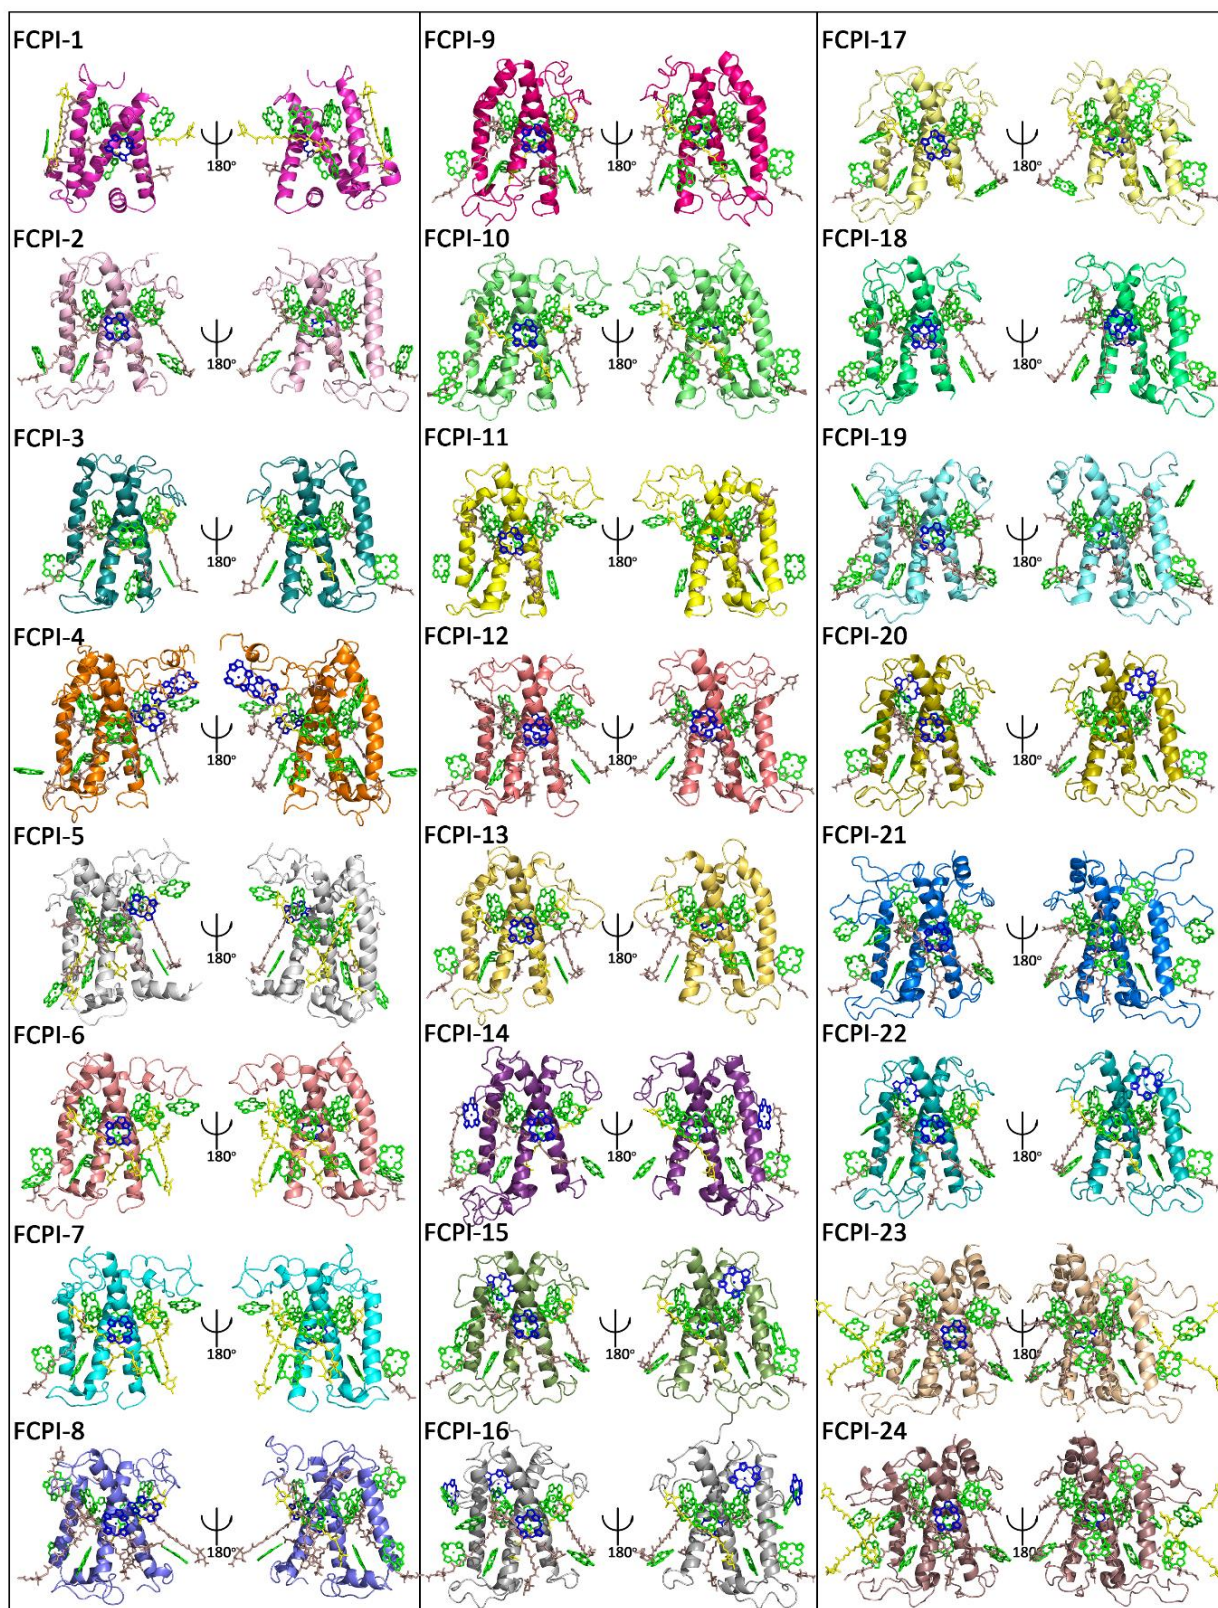

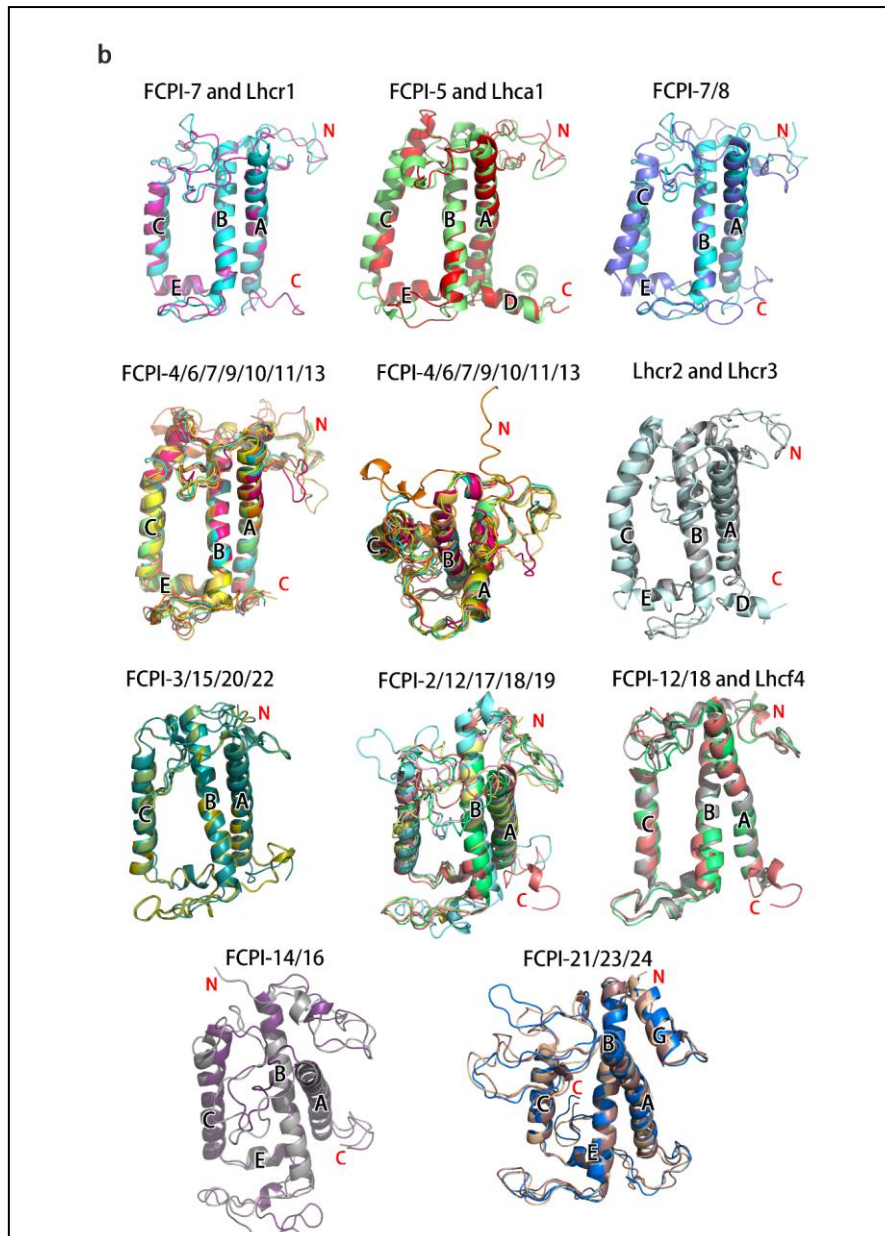

**Supplementary Fig. 3. Structures of individual FCPIs and their comparisons with other Lhcr and Lhcf proteins.** **a**, Structures of the 24 FCPIs. Chl *a*, Chl *c*, Ddx and Fx are shown in sticks with the phytol chains omitted and colored in green, blue, yellow and darksalmon, respectively. **b**, Comparisons of the structures among different FCPIs and between FCPIs and Lhcr1, Lhcr2, Lhcr3 from a red alga *C. merolae*<sup>1</sup>, Lhc a1 from *Pisum sativum*<sup>2</sup>, and Lhcf4 from *P. tricornutum*<sup>3</sup>. Based on the structures the 24 FCPIs are divided into five groups. Group I (FCPI-4/5/6/7/8/9/10/11/13) belongs to Lhcr1/2/3-type proteins. Their comparisons with Lhcr1/2/3 from red algae and Lhca1 from *P. sativum* are shown in the first and second row. Group II (FCPI-2/3/12/15/17/18/19/20/22) comparison with Lhcf4 from *P. tricornutum* is shown in the third row, and group III (FCPI-14/16) and IV (FCPI-21/23/24) are shown in the fourth row. The unique FCPI-1 belongs to group V and was shown in Fig. 4b. The color code of FCPI subunits in supplementary Fig. 3b are the same as those in supplementary Fig. 3a, and Lhcr 1/2/3 of red algae are in magenta, aquamarine and gray colors while the Lhca1 of *P. sativum* is in green.

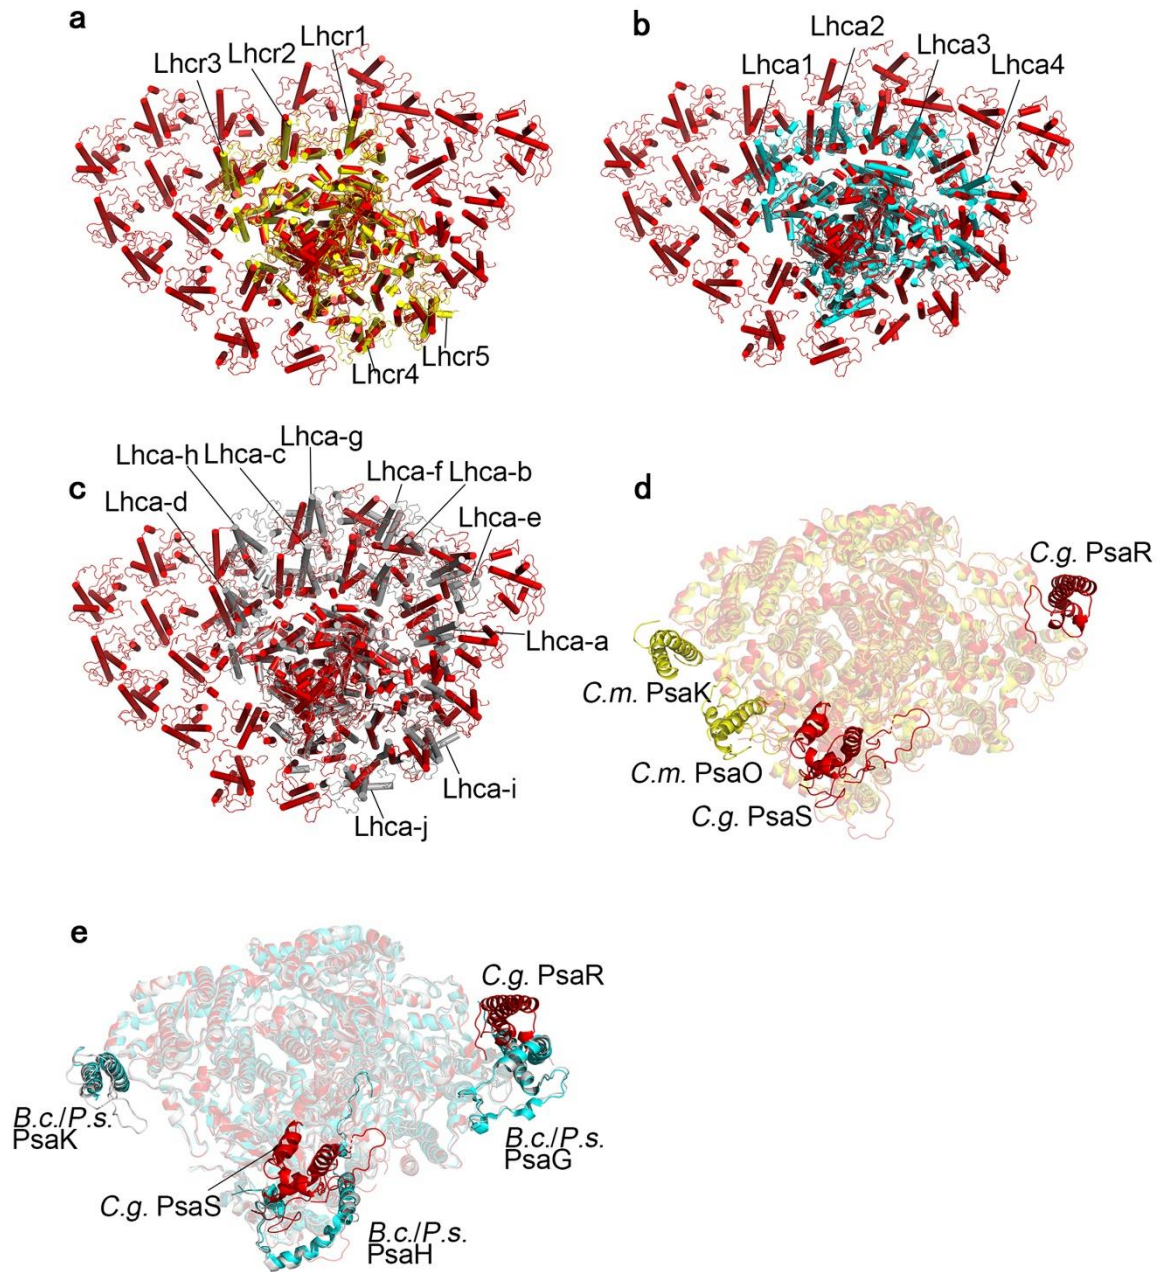

**Supplementary Fig. 4. Comparison of the structures of *C. gracilis* PSI-FCPI with that of *C. merolae*, *B. corticulans* and *P. sativum*.** **a, b, c,** Superposition of the diatom PSI-FCPI with PSI-LHCI of a red alga *C. merolae* (**a**), a higher plant *P. sativum* (**b**), and a green alga *B. corticulans* (**c**), showing the differences in the type and number of antennas among the three PSI-LHCI. **d, e,** Superposition of the PSI core structures between the diatom and other three species. All panels are viewed from the stromal side. Color codes used: Red, *C. gracilis* PSI-FCPI; yellow, *C. merolae* PSI-LHCI; grey, *B. corticulans* PSI-LHCI; cyan, pea PSI-LHCI.

a

|                         | 1                     | 10                      | 20             |                          |
|-------------------------|-----------------------|-------------------------|----------------|--------------------------|
| FCPI-17 [P.tricornutum] | .....AFEDELGAQPPPLGF  | FDPLGLVAD.....          | GDQEK          | F                        |
| FCPI-18 [P.tricornutum] | .....AFEDELGAQPPPLGF  | FDPLGLVAD.....          | GDQEK          | F                        |
| FCPI-12 [C.gracilis]    | .....AFENELGVQPPPLGF  | WDPLGLLDN.....          | ADQER          | F                        |
| FCPI-15 [C.gracilis]    | .....KVDEMPGATAPLKG   | FDPLNLAT.....           | LGSEST         | L                        |
| FCPI-20 [C.gracilis]    | .....KVDEMPGATAPLKG   | FDPLNLAT.....           | LGSEST         | L                        |
| FCPI-22 [C.gracilis]    | .....KVDEMPGATAPLKG   | FDPLNLAT.....           | LGSEST         | L                        |
| FCPI-16 [C.gracilis]    | .....SYTCISKEAILSSPD  | TTEIGRVWDPLGLAD.....    | IGSAET         | L                        |
| FCPI-21 [C.gracilis]    | .....SSAKAELEAIKKANPT | TLGYFDPLSLADKDF.....    | WGKNDAT        | I                        |
| FCPI-23 [C.gracilis]    | .....SSAKAELEAIKKANPT | TLGYFDPLSLADKDF.....    | WGKNDAT        | I                        |
| FCPI-24 [C.gracilis]    | .....AAKDDLIATAEKSNP  | VLKYFDPLQLGSTTI.....    | WGETNSAT       | I                        |
| FCPI-5 [C.gracilis]     | .....EKSQSLPFMNRFPAL  | DGSMAGDVGFDPLGLSNI..... | DDVGIDL        | L                        |
| FCPI-11 [C.gracilis]    | .....EMSESPLFLRPEKLD  | DGSMAGDVGFDPMGLS.....   | EQQDL          | L                        |
| FCPI-4 [C.gracilis]     | .....AMPERLWDSMVDKTQ  | RSKAVPFLPRAVNLDG        | SLPGDVGFDPFYLS | SSIPKDFSGFFIQPPWEEKGIPTL |
| FCPI-6 [C.gracilis]     | .....KSQLPFLPYENLSG   | .YVGDAGFDPFRRFS.....    | DFAPM          | P                        |
| FCPI-10 [T.pseudonana]  | .....AKSKALPWLNPNS    | LDG.RIGANGFDPLGLIS..... | EYFPV          | P                        |
| FCPI-7 [C.gracilis]     | .....EMSKAVPFVKAPANT  | AG.YVGDVGFDPLGLFS.....  | DYFDM          | P                        |
| FCPI-9 [C.gracilis]     | .....GSVFDNYVGAKDF    | RGQAQFKFDPLKLSET.....   | YEYFQ          | P                        |
| FCPI-13 [C.gracilis]    | .....MVGAEQPEPIFAPS   | R.TSKNFDPVGFAER.....    | SPENL          | P                        |
| FCPI-3 [C.gracilis]     | .....WKDENTIGITAPMG   | FFDPLGLSSG.....         | KSDEVM         | P                        |
| FCPI-19 [C.gracilis]    | .....TPLGGEVPVIGENY   | WDKLTLLEYG.....         | SEATG          | P                        |
| FCPI-2 [C.gracilis]     | .....LDGMVGTSVETGGK   | IFDPLNLSDY.....         | IPA            | P                        |
| FCPI-14 [C.gracilis]    | .....SINEAFGVSIETGNK  | CPPLGLARILED.....       | AQPSAI         | P                        |
| FCPI-8 [C.gracilis]     | .....ATGFEEVGGKP      | WDPLSLGKLEDAN.....      | DTFPMFPKS      | P                        |
| FCPI-1 [F.cylindrus]    | .....                 |                         |                | GM                       |

## Helix B

|                         | 30                | 40             | 50                | 60             | 70        |                 |
|-------------------------|-------------------|----------------|-------------------|----------------|-----------|-----------------|
| FCPI-17 [P.tricornutum] | DRLLRYVEIKKHGRISM | LAIVVGYLVQ     | EAGVRL.....       | PGTIIDYSG.KTF  | SEIPNG    |                 |
| FCPI-18 [P.tricornutum] | DRLLRYVEIKKHGRISM | LAIVVGYLVQ     | EAGVRL.....       | PGTIIDYSG.KTF  | SEIPNG    |                 |
| FCPI-12 [C.gracilis]    | DRLLRYVEIKKHGRISM | LAIVLGHIT      | SSGRTL.....       | GGNIDYSG.TAF   | SSIKTG    |                 |
| FCPI-15 [C.gracilis]    | AMFFRAAEELKHSRV   | AMLAITGYLVQ    | AAGIHF.....       | PGMLSSDVSFES   | LSAMKP    |                 |
| FCPI-20 [C.gracilis]    | AMFFRAAEELKHSRV   | AMLAITGYLVQ    | AAGIHF.....       | PGMLSSDVSFES   | LSAMKP    |                 |
| FCPI-22 [C.gracilis]    | AMFFRAAEELKHSRV   | AMLAITGYLVQ    | AAGIHF.....       | PGMLSSDVSFES   | LSAMKP    |                 |
| FCPI-16 [C.gracilis]    | AMFYRHSEVKKHGR    | IMAAAFVGNH     | VAGGLRF.....      | PGELSHGLEFSS   | IPSKG     |                 |
| FCPI-21 [C.gracilis]    | ARLRQSEIKKHGR     | IMAFVGYIVQ     | SN.FVF.....       | PNAQTLIAGAPHP  | SADLSP    |                 |
| FCPI-23 [C.gracilis]    | ARLRQSEIKKHGR     | IMAFVGYIVQ     | SN.FVF.....       | PNAQTLIAGAPHP  | SADLSP    |                 |
| FCPI-24 [C.gracilis]    | GFLRHSEIKKHGR     | IMAAAFVGYIVQ   | ANGIHF.....       | PWPMSSDGSFPF   | ADAGSP    |                 |
| FCPI-5 [C.gracilis]     | YMLREAEVKKHGR     | IVAMLAIVGILQ   | VEIFG.....        | PAPGCEMATK     | .....     | YEVDP           |
| FCPI-11 [C.gracilis]    | TYARWAEELKKHGR    | IMLAIVGMIVQ    | EYIH.....         | LPGEAYQNPDP    | .....     |                 |
| FCPI-4 [C.gracilis]     | YMMREAEELKHSRV    | AMLANFGMLAT    | DGAFGV.....       | TLRFPGGEIYSVEN | PIPTAY    |                 |
| FCPI-6 [C.gracilis]     | DFLREAEIKKHGR     | ICMLANLGFVAV   | DLGARI.....       | YPLPEAVEGLTS   | VT.....   |                 |
| FCPI-10 [T.pseudonana]  | DYLVSESEIKKHGR    | IVCMMAAGYVAV   | DLGARI.....       | YPLPEAMQGVTS   | .....     |                 |
| FCPI-7 [C.gracilis]     | KMLRESEIKKHGR     | ASMLACLGFVVO   | QY.....           | ITIPGYTHVDDAS  | .....     |                 |
| FCPI-9 [C.gracilis]     | GMPRESELRHGR      | ITAMLAIVGYIAT  | DFVR.....         | IPGEMYSEAI     | IPKSA     |                 |
| FCPI-13 [C.gracilis]    | PMYREAEELKKHGR    | AMLAIVGVVPEFVR | .....             | IPGEQSFEE      | AIKPV     |                 |
| FCPI-3 [C.gracilis]     | NLYREAEELKKHGR    | IVAMAAACLGWYI  | TAAG.....         | VHPAFNSALSSDP  | .....     |                 |
| FCPI-19 [C.gracilis]    | TYLRRAAEELKHSRV   | AMLAIVTGF      | AFHKLGLTLN        | SNISPE.....    | YLSIRDNIK | FADLAAMSP       |
| FCPI-2 [C.gracilis]     | DRARAAEELANGR     | ASMLATVGYVFP   | KWFGHEG.....      | DVSVDDP        | .....     |                 |
| FCPI-14 [C.gracilis]    | KMFQNAEIKKHGR     | IMVATIGYLVQ    | KLGVHFPLYL        | GPSSGNC        | FHPES     | ETAWLLSSSTGVTFS |
| FCPI-8 [C.gracilis]     | QYLQESSEIKKHGR    | MSMLANTGVNATH  | VGGMG.....        | LGMH           | IPGMPV    | ESDWTKA         |
| FCPI-1 [F.cylindrus]    | GPSVHAEELKWN      | GRHAMEFGWF     | FICCTAYAKGHG..... | LIPDM          | DVPLN     | KREWTG          |

## Helix C

|                         | 80              | 90         | 100            | 110                 | 120                   |           |
|-------------------------|-----------------|------------|----------------|---------------------|-----------------------|-----------|
| FCPI-17 [P.tricornutum] | FAAFKEIPAGGLVQL | LFITGVLE   | SSVMRDLTGEAEFV | GDFRNGAIDFG.....    |                       |           |
| FCPI-18 [P.tricornutum] | FAAFKEIPAGGLVQL | LFITGVLE   | SSVMRDLTGEAEFV | GDFRNGAIDFG.....    |                       |           |
| FCPI-12 [C.gracilis]    | LACLSDIPQAGLLQ  | IVAFITG    | LFVMDKAKGTGE   | FFPGDFRN.GIDFG..... |                       |           |
| FCPI-15 [C.gracilis]    | LDANDAVPEGGKNI  | YFTIFLAE   | FITECKGT.....  | HYTKGGPLPTI         | .....                 | VFP.....P |
| FCPI-20 [C.gracilis]    | LDANDAVPEGGKNI  | YFTIFLAE   | FITECKGT.....  | HYTKGGPLPTI         | .....                 | VFP.....P |
| FCPI-22 [C.gracilis]    | LDANDAVPEGGKNI  | YFTIFLAE   | FITECKGT.....  | HYTKGGPLPTI         | .....                 | VFP.....P |
| FCPI-16 [C.gracilis]    | LEANDAVPGWGVQ   | MLFAGLE    | FHDELFTTRAEGG  | HYLRGGTPGKN.....    | MVPGLFDP              |           |
| FCPI-21 [C.gracilis]    | EAQWDAVPLGAKWQ  | IFAVISALEL | WDCEGGG.....   | GALPHYTKGRKPGQ      | YPPFTLFRDNVH.FVLDLYDP |           |
| FCPI-23 [C.gracilis]    | EAQWDAVPLGAKWQ  | IFAVISALEL | WDCEGGG.....   | GALPHYTKGRKPGQ      | YPPFTLFRDNVH.FVLDLYDP |           |
| FCPI-24 [C.gracilis]    | PEQWDAVPLGAKWQ  | IFAVISALEL | WFSEAAAG.....  | KHYMRGGKPGAFP       | NFSDSLIPHVPVNLNLYDP   |           |
| FCPI-5 [C.gracilis]     | CQMDAFVQLWGAP   | QYIAFG     | GLIMIMMIEMIS   | SGIATTQGRES         | GERA.....             | PGDFGLDP  |
| FCPI-11 [C.gracilis]    | FQGAISTVGLGVNG  | QIFAAIG    | .....          | CVLELINFNKH         | YDGE.....             | PGDIGWTG  |
| FCPI-4 [C.gracilis]     | EAHNALVSQSGM    | GLLILAG    | FEFCTGAVLVE    | VAKGDSRE.....       | AGDFKLDP              |           |
| FCPI-6 [C.gracilis]     | AHDALVQQGAMS    | QIFLWCSVF  | EASTVS.....    | VIQMLEYESGRE        | .....                 | PGNFGFDP  |
| FCPI-10 [T.pseudonana]  | AHDPAVAFGSMG    | NMFITIAL   | FEMVGWIG.....  | LSQTLQG.SGRE        | .....                 | PGDFGWG   |
| FCPI-9 [C.gracilis]     | NLAPQVGSAMLQ    | IVLMGVLE   | FWTNKGNVT      | MTMTFSSPD           | RV.....               | PGDFGDFP  |
| FCPI-13 [C.gracilis]    | DAHDALVSGPMS    | QLLWIGL    | FDLVVTPAPV     | AMGQGERE.....       | PGDFGWK               |           |
| FCPI-3 [C.gracilis]     | DAHDALVPS       | MIQIFG     | MSIFLEACT      | FFPAMAGLGGK         | YDRK.....             | PGDFSDFP  |
| FCPI-19 [C.gracilis]    | LEAAKQLETTGW    | LVQFVLC    | GGALEWLAQQ     | TKARPGYQ            | PGDILG.....           |           |
| FCPI-2 [C.gracilis]     | IEAVXKHIPARGMA  | QIFAAIAV   | ITELTHRNG      | LAYDESVAPG.....     | LQPGGLTG              |           |
| FCPI-14 [C.gracilis]    | LDALGQADPQWMA   | QIFPCGT    | LEAKYRME       | LECKSS              | TSGGEP.....           | ALD       |
| FCPI-8 [C.gracilis]     | LDALGQVPAQWMA   | QIFFVAG    | FEESVAYY       | RQWVDSPT            | PGDYGYDP.....         | LG        |
| FCPI-1 [F.cylindrus]    | LGVFAAEQPALFG   | AILLIFISIA | EGEVGSHG       | SDNWRNM             | STKEPG.....           | NLGPDW    |
|                         | LATITG          | GGTITNGRAV | ILLANAH        | FFAISLMAT           | .....                 |           |

## Helix A

|                         | 130                | 140             | 150         | 160                          |                |
|-------------------------|--------------------|-----------------|-------------|------------------------------|----------------|
| FCPI-17 [P.tricornutum] | ...WDTFDEETQFKKRA  | ELNNGRAAOMG     | TALMVHEQ    | LG.....                      |                |
| FCPI-18 [P.tricornutum] | ...WDTFDEETQFKKRA  | ELNNGRAAOMG     | TALMVHEQ    | LG.....                      |                |
| FCPI-12 [C.gracilis]    | ...WNNFDEEKKMKRA   | ELNNGRAAOMG     | LGLMVHEK    | IGDPIYIINELLGY               |                |
| FCPI-15 [C.gracilis]    | IDFS.TVNPQELKTRQNR | ELNNGRAAMIA     | MSFVAAANIP  | GSVPALAGNPM                  |                |
| FCPI-20 [C.gracilis]    | IDFS.TVNPQELKTRQNR | ELNNGRAAMIA     | MSFVAAANIP  | GSVPALAGNPM                  |                |
| FCPI-22 [C.gracilis]    | IDFS.TVNPQELKTRQNR | ELNNGRAAMIA     | MSFVAAANIP  | GSVPALAGNPM                  |                |
| FCPI-16 [C.gracilis]    | FGFSKGGKEEALAKGRD  | REIKNNGRAMIG    | VAGLYCAATIP | GSVPLQP                      |                |
| FCPI-21 [C.gracilis]    | FGFNKNMSEETKERRLV  | SEIKNNGRAMLGT   | FGFLCADDIP  | GSVPLLKDIAIPYSGQVMQPFEGQFSYF |                |
| FCPI-23 [C.gracilis]    | FGFNKNMSEETKERRLV  | SEIKNNGRAMLGT   | FGFLCADDIP  | GSVPLLKDIAIPYSGQVMQPFEGQFSYF |                |
| FCPI-24 [C.gracilis]    | FGFSKGGKTEAQKADGL  | IKELNNGRAMIG    | MGLFAEQKVE  | GSVPLLKAVVPHYDGEVMAFFM       |                |
| FCPI-5 [C.gracilis]     | LGYGKGDAAGFARLQA   | CEIANGRAMFAA    | AGEITVQCGTT | HOGALENMTALRDNSF             |                |
| FCPI-11 [C.gracilis]    | GLLKNKSPAEIMKAKE   | CEITHCGRAMIA    | ITGATVQTL   | LFHOPLL.....                 |                |
| FCPI-4 [C.gracilis]     | LSFLKGGKEEIKRMKT   | REIANGRAMLAF    | GGVATQTAL   | EGNHAFYPF                    |                |
| FCPI-6 [C.gracilis]     | LGFLKGGKEAEVNEMK   | IKELNNGRAMLAF   | SGVVITQAVLT | QGFPPY.....                  |                |
| FCPI-10 [T.pseudonana]  | KQFMGKTQAEIDTMK    | IKELTNGRAMLAF   | AGVVITQSVLY | DKGFPY.....                  |                |
| FCPI-7 [C.gracilis]     | MGLSVGKSQAEKDEMA   | LKIKNNGRAMLA    | IGGMIHNNW   | VTGEPL.....                  |                |
| FCPI-9 [C.gracilis]     | WFAPSSKDAFDKKR     | EAELNNGRAMFAT   | GGTATQSVLS  | GHGFPY.....                  |                |
| FCPI-13 [C.gracilis]    | LGLYPTDPEKQKKML    | QELKNGRAMIA     | ITGMMVTGA   | AVTGHGFPYL.....              |                |
| FCPI-3 [C.gracilis]     | AAYVVDNDEGVVDY     | QNKSELNNGRAMVAF | MGIFVQDLY   | FGNYGDQIFR                   |                |
| FCPI-19 [C.gracilis]    | DLGNWPLNIKVTD      | RRRLSELNNGRAMFA | ISANWAAEA   | IPGSVPI                      |                |
| FCPI-2 [C.gracilis]     | WMKMYPKDEAGRRD     | MELEKLNNGRAMLG  | IAGFVSAHF   | IPGAPGA                      |                |
| FCPI-14 [C.gracilis]    | TKREGGWDEELTSL     | RLKELNNGRAMMT   | IAAWVSD     | EMIPGALPVWH                  |                |
| FCPI-8 [C.gracilis]     | MGLTRKLEEQVARY     | KIVELNNGRAMIA   | ASLFA       | AMEAIPGSVPIMNVFN             |                |
| FCPI-1 [F.cylindrus]    | ICPLPFGD           | SLLLLTTEEA      | MINNGRAMIG  | ILISLIFATA                   | LEGKPMLDIVNEWT |



**Supplementary Fig. 5. Phylogenetic analysis and amino acid sequences alignment of FCPIs.** **a**, Alignment of FCPIs sequences. The relationship between the numbering of FCPI and Uniprot ID is shown in supplementary Table 1. **b**, Phylogenetic tree of FCPs in diatoms. **c**, Sequence alignment of PsaR from four species of diatoms. **d**, Comparison of the sequences of PsaR from *C. gracilis* and PsaG from *P. sativum*. Sequence alignment and phylogenetic analysis were performed using MEGA X<sup>4</sup> and Phylogeny.fr<sup>5</sup>. Residues painted with red represent the same amino acids, and residues within blue frames represent similar amino acids. Evolutionary history was analyzed based on the Neighbor-Joining method<sup>6</sup>, and the optimal tree with a sum of branch length = 16.47780753 is shown. The percentage of replicate trees in which the associated taxa are clustered together in the bootstrap test (1000 replicates) are shown next to the branches<sup>7</sup>. The tree is drawn in scale, with branch lengths in the same units as those of the evolutionary distances used to infer the phylogenetic tree. The evolutionary distances were computed using the Poisson correction method<sup>8</sup>, and are in the unit of the number of amino acid substitutions per site. All ambiguous positions were removed for each sequence pair (pairwise deletion option). There was a total of 414 positions in the final dataset. The phylogenetic tree is optimized using fig tree1.4.4<sup>9</sup>.

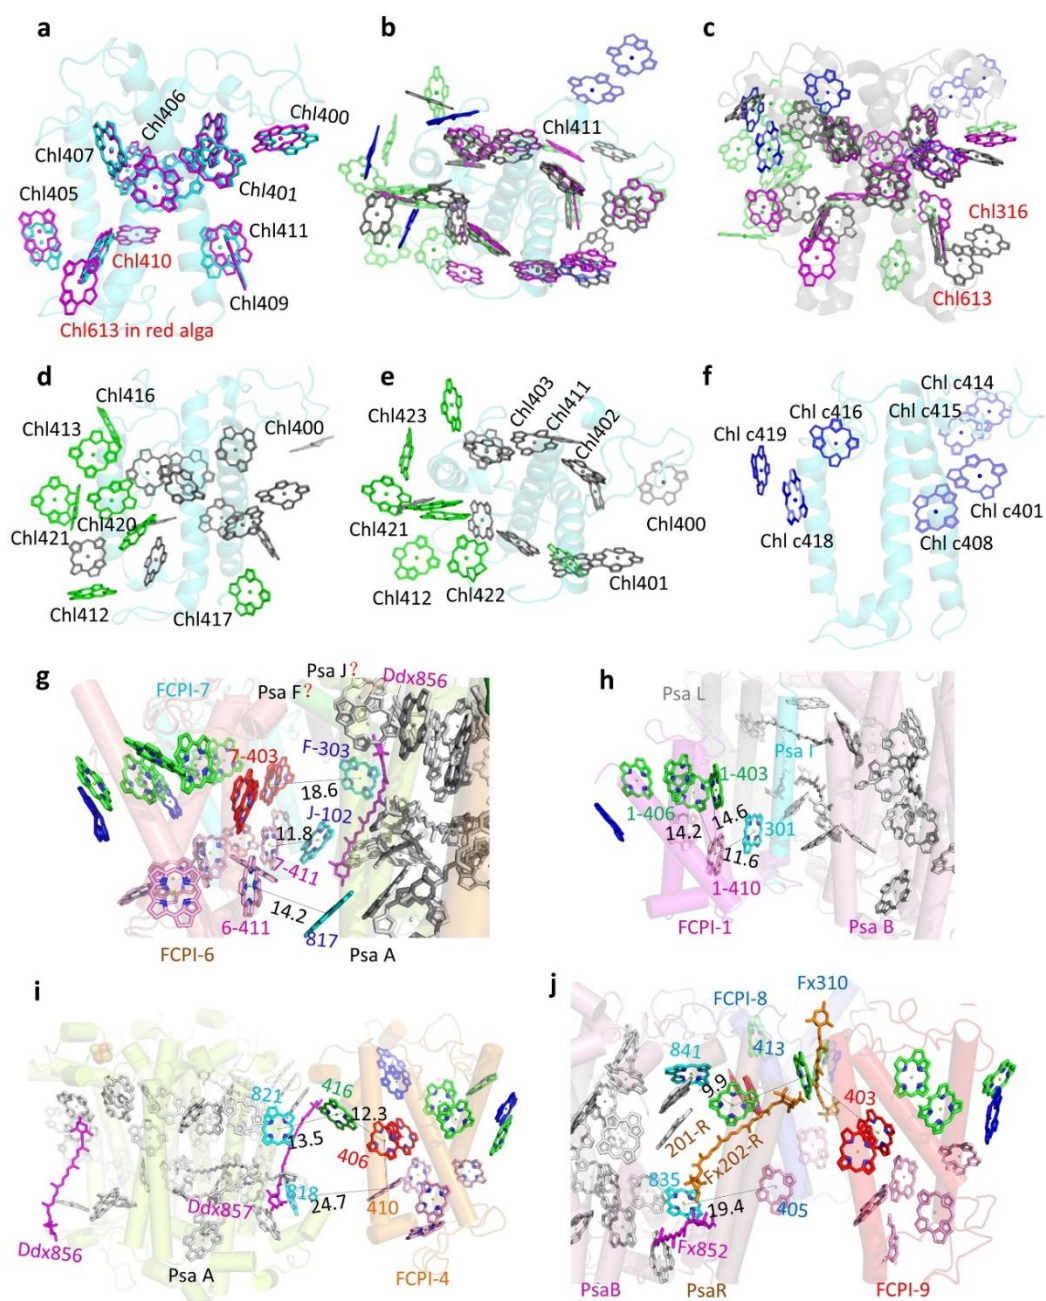



colored in blue. Two Fx and two Ddx in the PSI core are labeled. **k**, Five Fxs (stick, orange) in FCPI-7 identical to those in red algal Lhcrs (ribbon, magenta). An additional Zea201 was found in Lhcr3. **l**, Comparison of Fxs in FCPI-7 with those in LHCI (ribbon, magenta). Two central Car sites of LHCI are conserved, whereas Lut321 and Bcr618 are lost and additional Fxs appeared in FCPIs. **m**, Highlight of Car-binding sites near helix C of FCPI. **n, o, p, q**, Pigment-pigment interactions among FCPI antennas. The Cars involved in interactions among FCPI antennas are labeled in the same color of the FCPI they are associated (FCPI-4, 12, 14, 22, 23, 24).

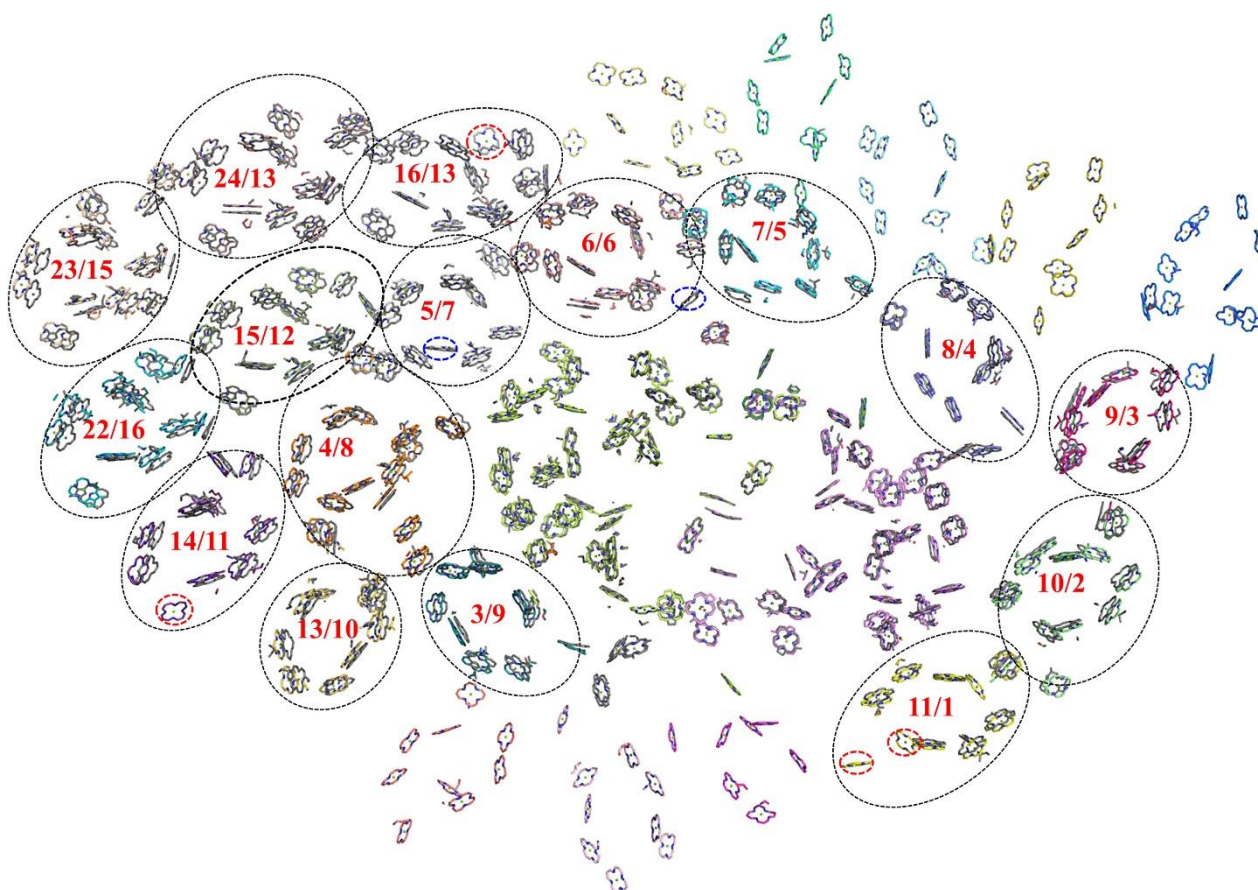

**Supplementary Table 1. Amino acid sequences and cofactors constructed in *C. gracilis* PSI-FCPI structure.**

| Subunits          | Chain | Source (UniProt ID)                                 | Residues         | Chls        | Cars                      | Lipids and ligands                                                           |
|-------------------|-------|-----------------------------------------------------|------------------|-------------|---------------------------|------------------------------------------------------------------------------|
| PsaA              | a     | TM <i>C. gracilis</i> <sup>a</sup>                  | 16-757           | 45 a        | 4 Bcr, 2 Ddx              | 1 SQDG, 2 MGDG<br>3 PG, 1 PQ, 1 Fe <sub>4</sub> S <sub>4</sub>               |
| PsaB              | b     | TM <i>C. gracilis</i><br><i>P. sativum</i> (P05311) | 2-723<br>724-733 | 40 a        | 7 Bcr, 1 Fx               | 1 DPPG, 1 DGDG, 1<br>PQ                                                      |
| PsaC              | c     | <i>P. sativum</i> (P10793)                          | 2-81             |             |                           | 2 Fe <sub>4</sub> S <sub>4</sub>                                             |
| PsaD              | d     | <i>P. sativum</i> (A5Z2K3) <sup>b</sup>             | 79-210           |             |                           |                                                                              |
| PsaE              | e     | <i>P. sativum</i> (E1C9K6) <sup>c</sup>             | 2-64             |             |                           |                                                                              |
| PsaF              | f     | <i>P. sativum</i> (P12355) <sup>d</sup>             | 77-238           | 3 a         | 1 Bcr                     | 1 MGDG, 1 PG                                                                 |
| PsaI              | i     | <i>P. sativum</i> (P17227)                          | 2-34             | 1 a         | 1 Bcr                     |                                                                              |
| PsaJ              | j     | <i>P. vulgaris</i> (A4GGC6)                         | 1-41             | 1 a         | 1 Bcr                     |                                                                              |
| PsaL              | l     | TM <i>C. gracilis</i> <sup>e</sup>                  | 4-147            | 3 a         | 3 Bcr                     |                                                                              |
| PsaM              | m     | <i>C. merolae</i> (Q85G73)                          | 2-29             |             | 1 Bcr                     |                                                                              |
| PsaR              | h     | TM <i>C. gracilis</i>                               | 51-139           | 1 a         | 1 Fx                      |                                                                              |
| PsaS              | g     | polyA                                               | 17-150           |             |                           |                                                                              |
| FCPI-1: Fc13194   | B     | <i>F. cylindrus</i> (A0A1E7F4Y9) <sup>f</sup>       | 60-218           | 6 a, 1 c    | 2 Ddx, 2 Fx               |                                                                              |
| FCPI-2: Cg25468   | U     | TM <i>C. gracilis</i>                               | 1-156            | 8 a, 1 c    | 4 Fx                      |                                                                              |
| FCPI-3: Cg17531   | I     | TM <i>C. gracilis</i>                               | 34-194           | 10 a        | 1 Ddx, 3 Fx               |                                                                              |
| FCPI-4: Cglhcr11  | G     | TM <i>C. gracilis</i> <sup>g</sup>                  | 32-245           | 12 a, 3 c   | 1 Ddx, 6 Fx               | 1 DGDG                                                                       |
| FCPI-5: Cglhcr7   | E     | TM <i>C. gracilis</i>                               | 35-222           | 9 a, 1 c    | 3 Ddx, 3 Fx               | 1 MGDG, 1 PG                                                                 |
| FCPI-6: Cglhcr4   | D     | TM <i>C. gracilis</i>                               | 35-206           | 12 a, 1 c   | 4 Ddx, 1 Fx               |                                                                              |
| FCPI-7: Cg1hcr1   | A     | TM <i>C. gracilis</i>                               | 35-202           | 10 a, 1 c   | 4 Ddx, 2 Fx               | 1 SQDG                                                                       |
| FCPI-8: Cglhcr10  | F     | TM <i>C. gracilis</i>                               | 36-215           | 8 a, 2 c    | 1 Ddx, 7 Fx               | 1 PG                                                                         |
| FCPI-9: Cg270215  | J     | TM <i>C. gracilis</i>                               | 33-199           | 10 a, 1 c   | 1 Ddx, 4 Fx               |                                                                              |
| FCPI-10: TpLhcr14 | H     | <i>T. pseudonana</i> (B8C0K4)                       | 33-202           | 12a, 1 c    | 2 Ddx, 3 Fx               |                                                                              |
| FCPI-11: Cglhcr3  | C     | TM <i>C. gracilis</i>                               | 35-197           | 9 a, 1 c    | 1 Ddx, 3 Fx               | 1 DGDG                                                                       |
| FCPI-12: Cglhcf4  | T     | TM <i>C. gracilis</i>                               | 1-172            | 7 a, 2 c    | 7 Fx                      |                                                                              |
| FCPI-13: Cglhca   | K     | TM <i>C. gracilis</i>                               | 38-205           | 9 a, 1 c    | 2 Ddx, 3 Fx               |                                                                              |
| FCPI-14: CgFCP2   | L     | TM <i>C. gracilis</i>                               | 34-229           | 8 a, 2 c    | 1 Ddx, 3 Fx               |                                                                              |
| FCPI-15: Cg270221 | P     | TM <i>C. gracilis</i>                               | 32-204           | 10 a, 2 c   | 1 Ddx, 4 Fx               |                                                                              |
| FCPI-16: Cg6139   | M     | TM <i>C. gracilis</i>                               | 57-243           | 10 a, 3 c   | 1 Ddx, 4 Fx               | 1 MGDG                                                                       |
| FCPI-17: PtLhcf4  | W     | <i>P. tricornutum</i> (B7FRW2)                      | 1-161            | 10a, 1 c    | 2 Ddx, 2 Fx               |                                                                              |
| FCPI-18: PtLhcf4  | X     | <i>P. tricornutum</i> (B7FRW2)                      | 1-161            | 8 a, 2 c    | 5 Fx                      |                                                                              |
| FCPI-19: Cg37296  | V     | TM <i>C. gracilis</i>                               | 1-179            | 10 a, 1 c   | 6 Fx                      |                                                                              |
| FCPI-20: Cg270221 | O     | TM <i>C. gracilis</i>                               | 32-204           | 9 a, 2 c    | 1 Ddx, 4 Fx               | 2 PG                                                                         |
| FCPI-21: Cg10219  | N     | TM <i>C. gracilis</i>                               | 33-251           | 12 a, 1 c   | 6 Fx                      |                                                                              |
| FCPI-22: Cg270221 | Q     | TM <i>C. gracilis</i>                               | 32-204           | 9 a, 2 c    | 1 Ddx, 4 Fx               | 1 PG                                                                         |
| FCPI-23: Cg10219  | S     | TM <i>C. gracilis</i>                               | 32-251           | 12 a, 1 c   | 2 Ddx, 7 Fx               |                                                                              |
| FCPI-24: Cg270092 | R     | TM <i>C. gracilis</i>                               | 36-246           | 12 a, 1 c   | 2 Ddx, 7 Fx               |                                                                              |
| Others            | Y Z   |                                                     |                  |             |                           | 11 MGDG, 12 PG                                                               |
| PSI-FCPI          |       |                                                     |                  | 326 a, 34 c | 18 Bcr, 35<br>Ddx, 102 Fx | 2 SQDG, 3 DGDG,<br>16 MGDG, 22 PG, 2<br>PQ, 3 Fe <sub>4</sub> S <sub>4</sub> |

TM *C. gracilis*: Transcriptome of *C. gracilis*; DGDG, digalactosyldiacyl glycerol; MGDG, monogalactosyldiacyl glycerol; PG, phosphatidyl glycerol; SQDG, sulfoquinovosyldiacyl glycerol. a: The amino acid sequence of PsaA is composed of three transcriptional sequences. b: The L90 and F99 change to W90 and K99 in A5Z2K3. c: The V61 changes to Q61 in E1C9K6. d: PolyA is used in amino acid 228-238 of PsaF. e: Residues 146-147 of PsaL were used sequences of *P. sativum* (E1C9L1). f: The residues 153-179 were deleted in A0A1E7F4Y9. g: The L154 change to V154 in FCPI-4.

Supplementary Table 2. Pigment-binding sites in the 24 FCPI antennas.

| Sites - r | Sites - d | FCPI - 1     | FCPI - 2     | FCPI - 3     | FCPI - 4     | FCPI - 5     | FCPI - 6     | FCPI - 7     | FCPI - 8     | FCPI - 9     | FCPI - 10    | FCPI - 11    | FCPI - 12    | FCPI - 13    | FCPI - 14    | FCPI - 15    | FCPI - 16    | FCPI - 17    | FCPI - 18    | FCPI - 19    | FCPI - 20    | FCPI - 21    | FCPI - 22    | FCPI - 23    | FCPI - 24    |
|-----------|-----------|--------------|--------------|--------------|--------------|--------------|--------------|--------------|--------------|--------------|--------------|--------------|--------------|--------------|--------------|--------------|--------------|--------------|--------------|--------------|--------------|--------------|--------------|--------------|--------------|
| 601       | 400       |              |              |              | Chl <i>a</i> | Chl <i>a</i> | Chl <i>a</i> | Chl <i>a</i> |              |              | Chl <i>a</i> | Chl <i>a</i> |              |              |              |              |              |              |              |              |              |              |              |              |              |
| 609       | 401       |              | Chl <i>a</i> | Chl <i>a</i> | Chl <i>c</i> | Chl <i>c</i> | Chl <i>a</i> | Chl <i>a</i> | Chl <i>c</i> | Chl <i>a</i> |
| 602       | 402       | Chl <i>a</i> |
| 603       | 403       | Chl <i>a</i> | Chl <i>c</i> | Chl <i>a</i> | Chl <i>c</i> | Chl <i>a</i> |
| 604       | 404       |              | Chl <i>a</i> |
| 605       | 405       | Chl <i>a</i> | Chl <i>a</i> | Chl <i>a</i> |              |              | Chl <i>a</i> |
| 607       | 406       | Chl <i>a</i> |
| 608       | 407       | Chl <i>a</i> |
| 610       | 408       | Chl <i>c</i> | Chl <i>c</i> | Chl <i>a</i> | Chl <i>a</i> | Chl <i>a</i> | Chl <i>c</i> |
| 611       | 409       |              | Chl <i>a</i> |
| 606       | 410       | Chl <i>a</i> |              |              | Chl <i>a</i> |              | Chl <i>a</i> |              |              | Chl <i>a</i> | Chl <i>a</i> |              |              | Chl <i>a</i> |              |              |              |              |              |              |              | Chl <i>a</i> |              | Chl <i>a</i> | Chl <i>a</i> |
| 612       | 411       |              |              |              | Chl <i>a</i> |              | Chl <i>a</i> | Chl <i>a</i> |              | Chl <i>a</i> | Chl <i>a</i> |              |              |              |              |              |              |              |              |              |              |              |              |              |              |
|           | 412       |              |              |              | Chl <i>a</i> | Chl <i>a</i> | Chl <i>a</i> |              |              |              | Chl <i>a</i> |              |              |              |              |              | Chl <i>a</i> |              |              | Chl <i>a</i> |              |              |              |              |              |
|           | 413       |              |              |              |              |              |              |              | Chl <i>a</i> |              |              |              |              |              |              |              | Chl <i>a</i> |              |              | Chl <i>a</i> |              |              |              |              |              |
|           | 414       |              |              |              | Chl <i>c</i> |              |              |              |              |              |              |              |              |              |              |              |              |              |              |              |              |              |              |              |              |
|           | 415       |              |              |              | Chl <i>c</i> |              |              |              |              |              |              |              |              |              |              |              |              |              |              |              |              |              |              |              |              |
|           | 416       |              |              |              | Chl <i>a</i> |              |              |              |              |              |              |              |              |              |              | Chl <i>c</i> | Chl <i>c</i> | Chl <i>a</i> |              |              | Chl <i>c</i> | Chl <i>a</i> | Chl <i>c</i> | Chl <i>a</i> | Chl <i>a</i> |
|           | 417       |              |              | Chl <i>a</i> |              |              |              |              |              |              |              |              |              |              |              |              |              |              |              |              |              |              |              |              |              |
|           | 418       |              |              |              |              |              |              |              |              |              |              |              |              |              | Chl <i>c</i> |              |              |              |              |              |              |              |              |              |              |
|           | 419       |              |              |              |              |              |              |              |              |              |              |              |              |              |              |              | Chl <i>c</i> |              |              |              |              |              |              |              |              |
|           | 420       |              |              |              |              |              |              |              |              |              |              |              |              |              |              |              |              |              | Chl <i>a</i> |              |              |              |              |              |              |
|           | 421       |              |              |              |              |              |              |              |              |              |              |              |              |              |              |              |              |              |              |              |              | Chl <i>a</i> |              | Chl <i>a</i> | Chl <i>a</i> |
|           | 422       |              |              |              |              |              |              |              |              |              |              |              |              |              |              | Chl <i>a</i> |              | Chl <i>a</i> |              |              | Chl <i>a</i> |
|           | 423       |              |              |              |              |              |              |              |              |              |              |              |              |              |              | Chl <i>a</i> |              |              |              |              |              |              |              |              |              |
| 615       | 301       |              | Fx           | Fx           | Fx           | Fx           | Ddx          | Ddx          | Fx           | Fx           | Fx           |              | Fx           | Fx           |              | Fx           |
| 616       | 302       | Fx           | Fx           | Fx           | Fx           | Ddx          | Fx           | Fx           | Fx           | Fx           | Fx           |              | Fx           |
| 614       | 303       | Ddx          | Fx           | Ddx          | Fx           | Ddx          | Ddx          | Ddx          | Ddx          | Ddx          | Fx           | Fx           | Ddx          | Fx           | Ddx          | Fx           | Fx           |
|           | 304       |              |              |              |              |              |              |              |              |              |              |              | Fx           |              |              |              |              |              |              |              |              |              |              |              |              |
| 613       | 305       | Fx           | Fx           | Fx           | Fx           | Fx           | Ddx          | Ddx          | Fx           | Fx           | Ddx          | Fx           | Fx           | Ddx          | Fx           | Fx           | Fx           | Ddx          | Fx           |
| 617       | 306       |              |              |              | Fx           | Ddx          | Ddx          | Ddx          | Fx           |              |              |              | Fx           |
|           | 307       |              |              |              | Fx           | Fx           |              |              | Fx           |              |              | Fx           | Fx           |              |              | Fx           | Fx           |              |              | Fx           | Fx           | Fx           | Fx           | Fx           | Fx           |
|           | 308       | Ddx          |              |              | Fx           |              |              |              | Fx           |              |              |              |              |              |              |              |              |              |              | Fx           |              |              |              | Ddx          | Ddx          |
|           | 309       |              |              |              |              |              |              |              |              |              |              |              |              |              |              |              |              |              |              |              |              |              |              | Ddx          | Ddx          |
|           | 310       |              |              |              |              |              |              |              | Fx           |              |              |              |              |              |              |              |              |              |              |              |              |              |              | Fx           | Fx           |

Sites-r: Pigment sites in Lhcr1 of red alga; Sites-d: Pigment sites in FCPI complexes of diatom.

**Supplementary Table 3. Comparison of FCPIs between the present and Nagao et al.'s (2020)<sup>10</sup> structure.**

| Xu et al.         | Nagao et al.   | Sequences, same or not/number of different residues                | Xu et al.-Chls. | Xu et al.-Car. | Nagao et al.-Chls. <sup>10</sup> | Nagao et al.-Car. <sup>10</sup> |
|-------------------|----------------|--------------------------------------------------------------------|-----------------|----------------|----------------------------------|---------------------------------|
| FCPI-1, fc13194   |                |                                                                    | 6 a, 1 c        | 2 Ddx, 2 Fx    |                                  |                                 |
| FCPI-2, 25468     |                |                                                                    | 8 a, 1 c        | 4 Fx           |                                  |                                 |
| FCPI-3, 17531     | Fcpa9, lhcr9   | Yes                                                                | 10 a            | 1 Ddx, 3 Fx    | 6 a, 4 c                         | 1 Ddx, 3 Fx                     |
| FCPI-4, lhcr11    | Fcpa8, lhcr8   | Yes, 3 a. a.                                                       | 12 a, 3 c       | 1 Ddx, 6 Fx    | 7 a, 7 c                         | 2 Ddx, 5 Fx                     |
| FCPI-5, lhcr7     | Fcpa7, lhcr7   | Yes, 5 a. a.                                                       | 9 a, 1 c        | 3 Ddx, 3 Fx    | 9 a, 2 c                         | 3 Ddx, 3 Fx                     |
| FCPI-6, lhcr4     | Fcpa6, lhcr6   | Yes, 4 a. a.                                                       | 12 a, 1 c       | 4 Ddx, 1 Fx    | 10 a, 4 c                        | 4 Ddx, 1 Fx                     |
| FCPI-7, lhcr1     | Fcpa5, lhcr5   | Yes, 2 a. a. + 7 a. a. insertion in middle + 7 a. a. in C-terminal | 10 a, 1 c       | 4 Ddx, 2 Fx    | 7 a, 4 c                         | 3 Ddx, 2 Fx                     |
| FCPI-8, lhcr10    | Fcpa4, lhcr4   | Yes, 3 a. a.                                                       | 8 a, 2 c        | 1 Ddx, 7 Fx    | 7 a, 3 c                         | 6 Ddx, 2 Fx                     |
| FCPI-9, 270215    | Fcpa3, lhcr3   | Yes, 5 a. a.                                                       | 10 a, 1 c       | 1 Ddx, 4 Fx    | 8 a, 3 c                         | 3 Ddx, 2 Fx                     |
| FCPI-10, tplhcr14 | Fcpa2, lhcr2   | No                                                                 | 12a, 1 c        | 2 Ddx, 3 Fx    | 10 a, 3 c                        | 3 Ddx, 3 Fx                     |
| FCPI-11, lhcr3    | Fcpa1, lhcr1   | Yes, 3 a. a.                                                       | 9 a, 1 c        | 1 Ddx, 3 Fx    | 6 a, 2 c                         | 1 Ddx, 2 Fx                     |
| FCPI-12, lhcf4    |                |                                                                    | 7 a, 2 c        | 7 Fx           |                                  |                                 |
| FCPI-13, lhcA     | Fcpa10, lhcr10 | Yes, 4 a. a.                                                       | 9 a, 1 c        | 2 Ddx, 3 Fx    | 7 a, 3 c                         | 2 Ddx, 3 Fx                     |
| FCPI-14, FCP2     | Fcpa11, lhq1   | Yes, 2 a. a.                                                       | 8 a, 2 c        | 1 Ddx, 3 Fx    | 5 a, 4 c                         | 1 Ddx, 3 Fx                     |
| FCPI-15, 270221   | Fcpa12, lhq2   | No, 40 a. a.                                                       | 10 a, 2 c       | 1 Ddx, 4 Fx    | 8 a, 4 c                         | 2 Ddx, 3 Fx                     |
| FCPI-16, 6139     | Fcpa13, lhq3   | Yes, 3 a. a.                                                       | 10 a, 3 c       | 1 Ddx, 4 Fx    | 6 a, 6 c                         | 1 Ddx, 2 Fx                     |
| FCPI-17, ptlhcf4  |                |                                                                    | 10a, 1 c        | 2 Ddx, 2 Fx    |                                  |                                 |
| FCPI-18, ptlhcf4  |                |                                                                    | 8 a, 2 c        | 5 Fx           |                                  |                                 |
| FCPI-19, 37296    |                |                                                                    | 10 a, 1 c       | 6 Fx           |                                  |                                 |
| FCPI-20, 270221   |                |                                                                    | 9 a, 2 c        | 1 Ddx, 4 Fx    |                                  |                                 |
| FCPI-21, 10219    |                |                                                                    | 12 a, 1 c       | 6 Fx           |                                  |                                 |
| FCPI-22, 270221   | Fcpa16, lhq6   | Yes                                                                | 9 a, 2 c        | 1 Ddx, 4 Fx    | 9 a, 2 c                         | 1 Ddx, 2 Fx                     |
| FCPI-23, 10219    | Fcpa15, lhq5   | Yes, 3 a. a. + 3 a. a. in the C-terminal                           | 12 a, 1 c       | 2 Ddx, 7 Fx    | 13 a                             | 2 Ddx, 7 Fx                     |
| FCPI-24, 270092   | Fcpa14, lhq4   | Yes, 3 a. a.                                                       | 12 a, 1 c       | 2 Ddx, 7 Fx    | 10 a, 3 c                        | 7 Fx                            |

FCPIs whose sequences were different between the two structures are highlighted in red; Chls that were differently assigned in the two structures are highlighted in blue.

## Supplementary References

1. Pi, X. et al. Unique organization of photosystem I-light-harvesting supercomplex revealed by cryo-EM from a red alga. *Proc. Nat.l Acad. Sci. U. S. A.* **115**, 4423-4428 (2018).
2. Qin, X., Suga, M., Kuang, T., & Shen J.-R. Photosynthesis. Structural basis for energy transfer pathways in the plant PSI-LHCI supercomplex. *Science* **348**, 989-995 (2015).
3. Wang, W. et al. Structural basis for blue-green light harvesting and energy dissipation in diatoms. *Science* **363**, eaav0365 (2019).
4. Kumar, S., Stecher, G., Li, M., Knyaz, C. & Tamura, K. MEGA X: Molecular Evolutionary Genetics Analysis across computing platforms. *Mol. Biol. Evol.* **35**, 1547-1549 (2018).
5. Dereeper, A. et al. Phylogeny.fr: robust phylogenetic analysis for the non-specialist. *Nucleic Acids Res.* **36**, W465-9 (2008).
6. Saitou, N. & Nei, M. The neighbor-joining method: A new method for reconstructing phylogenetic trees. *Mol. Biol. Evol.* **4**, 406-425 (1987).
7. Felsenstein, J. Confidence limits on phylogenies: An approach using the bootstrap. *Evolution* **39**, 783-791 (1985).
8. Zuckerkand, E. & Pauling, L. Evolutionary divergence and convergence in proteins. in *Evolving Genes and Proteins* (eds. V. Bryson & H.J. Vogel), pp. 97-166. Academic Press, New York (1965).
9. Morariu, V. I., Srinivasan, B. V., Raykar, V. C., Duraiswami, R. & Davis, L. S. Automatic online tuning for fast Gaussian summation. *Adv. Neural Infor. Proc. Syst.* 21 (*NIPS*) 2008).
10. Nagao, R. et al. Structural basis for assembly and function of a diatom photosystem I-light harvesting supercomplex. *Nat. Comm.* **11**, 2481 (2020).
